# Supplementary material for: Theoretical evaluation of Na 2 MgCl 4 double chlorite as an electrolyte for all-solid-state sodium-ion batteries
Source: Royal Society of Chemistry journal article supplement (doi:10.1039/d5cp00254k), 2025-01-01
Supplement: d5cp00254k2.pdf [file d5cp00254k2.pdf]

## Theoretical Evaluation of Na<sub>2</sub>MgCl<sub>4</sub> Double Chlorite as an Electrolyte for All-Solid-State Sodium Ion Batteries

Yohandys A. Zulueta,<sup>a</sup> Jose R. Fernández-Gamboa,<sup>a</sup> Narciso Antonio Villar Goris,<sup>b</sup> My Phuong Pham-Ho<sup>c,d</sup> and Minh Tho Nguyen<sup>e,f,\*</sup>

---

<sup>a</sup> Departamento de Física, Facultad de Ciencias Naturales y Exactas, Universidad de Oriente, CP 90500, Santiago de Cuba, Cuba

<sup>b</sup> Autonomous University of Santo Domingo (UASD), Dominican Republic.

<sup>c</sup> Faculty of Chemical Engineering, Ho Chi Minh City University of Technology (HCMUT), 268 Ly Thuong Kiet Street, District 10, Ho Chi Minh City, 70000 Vietnam

<sup>d</sup> Vietnam National University Ho Chi Minh City, Linh Trung, Thu Duc, Ho Chi Minh City, 70000 Vietnam

<sup>e</sup> Laboratory for Chemical Computation and Modeling, Institute for Computational Science and Artificial Intelligence, Van Lang University, Ho Chi Minh City, 70000 Vietnam

<sup>f</sup> Faculty of Applied Technology, School of Technology, Van Lang University, Ho Chi Minh City, 70000 Vietnam

\* Email: [minhtho.nguyen@vlu.edu.vn](mailto:minhtho.nguyen@vlu.edu.vn)

## Supplementary Information

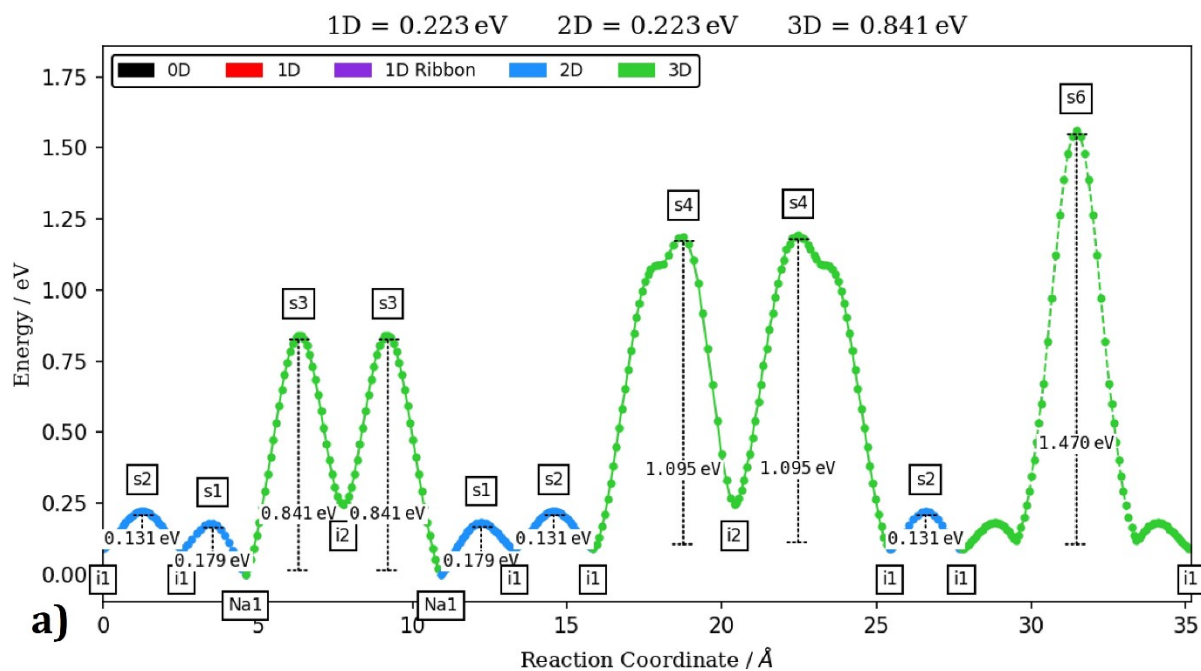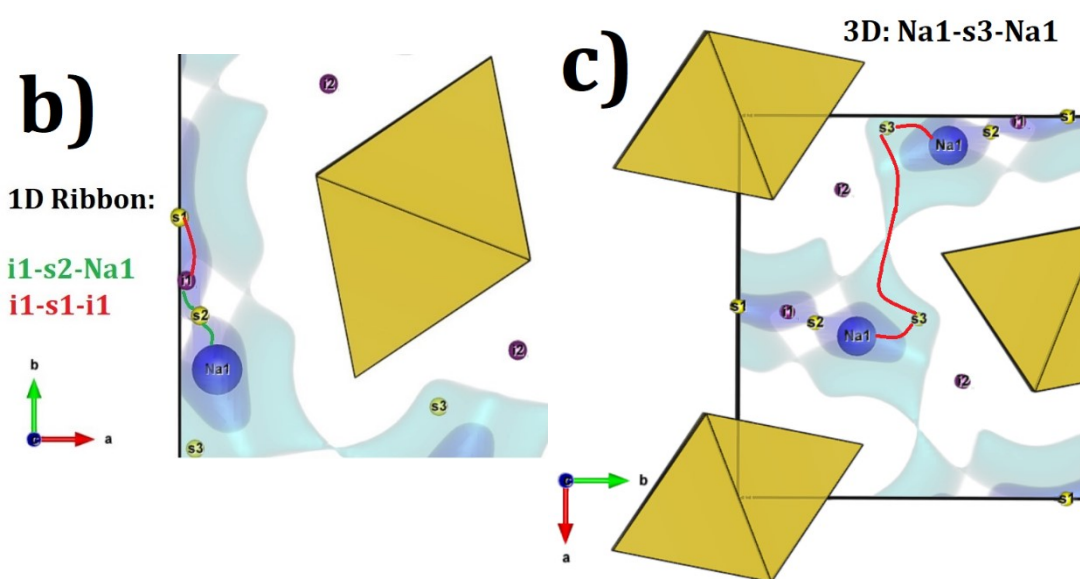

**Fig. S1:** a) Energy vs. reaction coordinate profile of  $\text{Na}_2\text{MgCl}_4$ , showing the 3D network of  $\text{Na}^+$  migration pathways (blue isosurfaces) calculated by bond valence site energy. b) 1D ribbons and c) 3D migration pathways. The yellow polyhedral in panels b) and c) represent the  $[\text{MgCl}_4]$  octahedral.

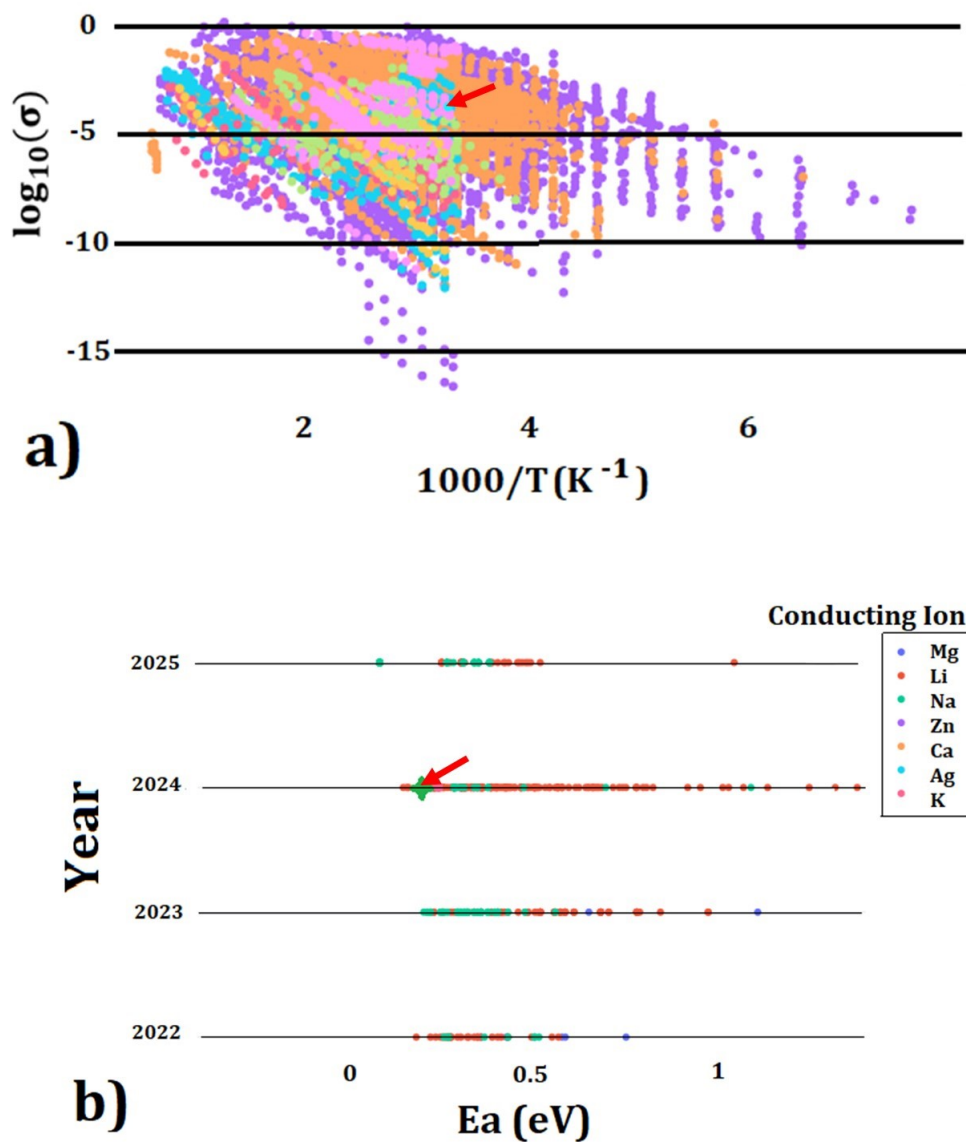

**Fig. S2:** Performance ranking of  $\text{Na}_2\text{MgCl}_4$  based on **a)** room-temperature conductivity ( $\sigma$ ) and **b)** theoretical activation energy ( $E_a$ ), as reported in the Dynamic Database for Solid State Electrolyte (DDSE). The red arrow denotes the activation energy and room-temperature conductivity specific to  $\text{Na}_2\text{MgCl}_4$ .
